# Supplementary material for: Pulmonary manifestations of Sjögren's syndrome
Source: PubMed Central journal article supplement — Eur Respir Rev. 2016 Jun;25(140):110–23. doi: 10.1183/16000617.0011-2016 (PMC9487244; doi:10.1183/16000617.0011-2016), 2016-06
Supplement: ERR-0011-2016_Marchand-Adam.pdf [file ERR-0011-2016_Marchand-Adam.pdf]

To view the full contents of this document, you need a later version of the PDF viewer. You can upgrade to the latest version of Adobe Reader from [www.adobe.com/products/acrobat/readstep2.html](http://www.adobe.com/products/acrobat/readstep2.html)

For further support, go to [www.adobe.com/support/products/acrreader.html](http://www.adobe.com/support/products/acrreader.html)
